# Supplementary material for: Peripheral blood markers predictive of outcome in Upper gastrointestinal cancers treated with immune checkpoint inhibitors
Source: Research Square preprint supplement (doi:10.21203/rs.3.rs-1562135/v1), 2022-04-18
Supplement: Supplementary file 1 [file 59e2f56c6064f39068e4e436.xlsx]

## Sheet: Sheet1
Table1 Baseline characteristics of all patients assessed for eligibility
Characteristics	N	(%)
Gender
Male	74	0.796
Female	19	0.204
Age (years)
≥65	44	0.473
＜65	49	0.527
ECOG
0~1	76	0.817
≥2	17	0.183
Clinical stage at immunotherapy
III	17	0.183
IV	76	0.817
Line of immunotherapy
First	67	0.72
Second	20	0.2
≥ Third	6	0.065
Carcinoma
Gastric carcinoma	46	0.495
Esophagus cancer	47	0.505
Response
CR	2	0.022
PR	24	0.258
SD	54	0.581
PD	13	0.14
ORR	26	0.28
DCR	80	0.84
LDH0
＜194.5	39	0.419
≥194.5	54	0.581
NLR0
＜4.39	58	0.624
≥4.39	35	0.376
PLR0
＜218.7	49	0.527
≥218.7	44	0.473
FAR0
＜0.13	52	0.559
≥0.13	14	0.151
Unknown	27	0.29
