# Supplementary material for: Peripheral blood markers predictive of outcome in Upper gastrointestinal cancers treated with immune checkpoint inhibitors
Source: Research Square preprint supplement (doi:10.21203/rs.3.rs-1562135/v1), 2022-04-18
Supplement: Supplementary file 2 [file 8b5a3419f5cbfe6f73eac690.xlsx]

## Sheet: Sheet1
Table 3:Univariate analysis and multivariate analysis of progression-free time.
Variables	N	Univariate Analysis HR (95% CI) P value	Multivariate Analysis HR (95% CI) P value
Gender		0.645(0.361,1.153)0.139
Male	74
Female	19
Age (years)		1.400(0.861,2.275)0.175
≥65	44
＜65	49
ECOG		1.008(0.538,1.885)0.981
0~1	76
≥2	17
Clinical stage at immunotherapy		0.272(0.117,0.632)0.002
III	17
IV	76
Line of immunotherapy		0.700(0.464,1.058)0.091
First	67
Second	20
≥ Third	6
Carcinoma		1.136(0.701,1.842)0.605
Gastric carcinoma	46
Esophagus cancer	47
LDH0		2.929（1.723,4.979）0.000
＜194.5	39
≥194.5	54
NLR0		2.632(1.599,4.327)0.000
＜4.39	58
≥4.39	35
PLR0		1.937(1.172,3.202)0.010
＜218.7	49
≥218.7	44
FAR0		2.158(1.106,4.211)0.024
＜0.13	52
≥0.13	14
LDH1		2.451(1.120,5.363)0.025
＜264.5	48
≥264.5	8
NLR1		1.580(0.828,3.015)0.166
＜2.64	24
≥2.64	35
PLR1		2.467(1.172,5.196)0.017	12.950(1.097,152.818)0.042
＜117.26	18
≥117.26	41
FAR1		1.943(0.968,3.903)0.063
＜0.09	23
≥0.09	31
LDH2		3.312(1.418,7.737)0.006
＜216.5	11
≥216.5	18
NLR2		0.775(0.306,1.960)0.590
＜8.71	25
≥8.71	7
PLR2		1.114(0.473,2.625)0.805
＜288.8	24
≥288.8	8
FAR2		1.350(0.396,4.596)0.631
＜0.16	28
≥0.16	3
